# Supplementary material
Source: PubMed Central journal article supplement (PMC5930335)
Supplement: AEM.02766-17_zam009188473s1.pdf [file AEM.02766-17_zam009188473s1.pdf]

1 **Supplementary data for**

2 **Impact of wastewater treatment on the prevalence of integrons and genetic**

3 **diversity of integron gene cassettes**

4 Xin-Li An<sup>a,b</sup>, Qing-Lin Chen<sup>a,b</sup>, Dong Zhu<sup>a,b</sup>, Yong-Guan Zhu<sup>a,c</sup>, Michael R. Gillings<sup>d</sup>,

5 Jian-Qiang Su<sup>a,\*</sup>

6 <sup>a</sup> Key Lab of Urban Environment and Health, Institute of Urban Environment,  
7 Chinese Academy of Sciences, 1799 Jimei Road, Xiamen, 361021, China

8 <sup>b</sup> University of Chinese Academy of Sciences, 19A Yuquan Road, Beijing, 100049,  
9 China

10 <sup>c</sup> State Key Laboratory of Urban and Regional Ecology, Research Center for  
11 Eco-Environmental Sciences, Chinese Academy of Sciences, Beijing, 100085, China

12 <sup>d</sup> Department of Biological Sciences, Macquarie University, Sydney, NSW, 2109,  
13 Australia

14 \*Corresponding Author

15 Jian-Qiang Su: 1799 Jimei Road, Xiamen, 361021, China, Email: [jqsu@iue.ac.cn](mailto:jqsu@iue.ac.cn), Tel:  
16 +86-592-6190997, Fax: +86-592-6190514

17 The authors declare no conflict of interest.

18

19

## Contents

### 20 **Figures:**

21 **Figure S1** Abundance (copies/ml) of the dominant genes encoded by class 1 integron  
22 gene cassettes. The gene cassettes *aadA* alleles (*aadA1*, *aadA2* and *aadA5*) confer  
23 resistance to aminoglycosides. INF, influent; AS, activated sludge; EFF, effluent.  
24 Mean  $\pm$ SD.

25 **Figure S2** Proportion of class 1 integron-associated gene cassettes in three  
26 wastewater treatment plants, basing on high throughput sequencing data. DNA rep.  
27 transp. and repair stands for DNA replication transport and repair.

28 **Figure S3** Rarefaction curves of integron gene cassettes in wastewater treatment  
29 plants, basing on the data of clone library. (a) Observed diversity of class 1 integron  
30 gene cassettes in three wastewater treatment plants. (b) Observed diversity of class 3  
31 integron gene cassettes in three wastewater treatment plants.

32

### 33 **Tables:**

34 **Table S1** Information of wastewater treatment plant samples.

35 **Table S2** An overview of class 1 integron gene cassette clone.

36 **Table S3** Number of clones carrying gene cassettes and gene cassette arrays.

37 **Table S4** Abundance of class 1 integron-associated gene cassettes based on high  
38 throughput sequencing data. Gene abundances were normalized to the average  
39 number of total reads for each sample.

40 **Table S5** Abundance of antibiotic resistance gene cassettes and heavy metal-associated

41 gene cassettes in class 1 integrons, basing on high throuput sequencing data.

42 **Table S6** Number of detected clones of class 3 integrons carrying at least 1 gene

43 cassette.

44

45

46

47

48

49

50

51

52

53

54

55

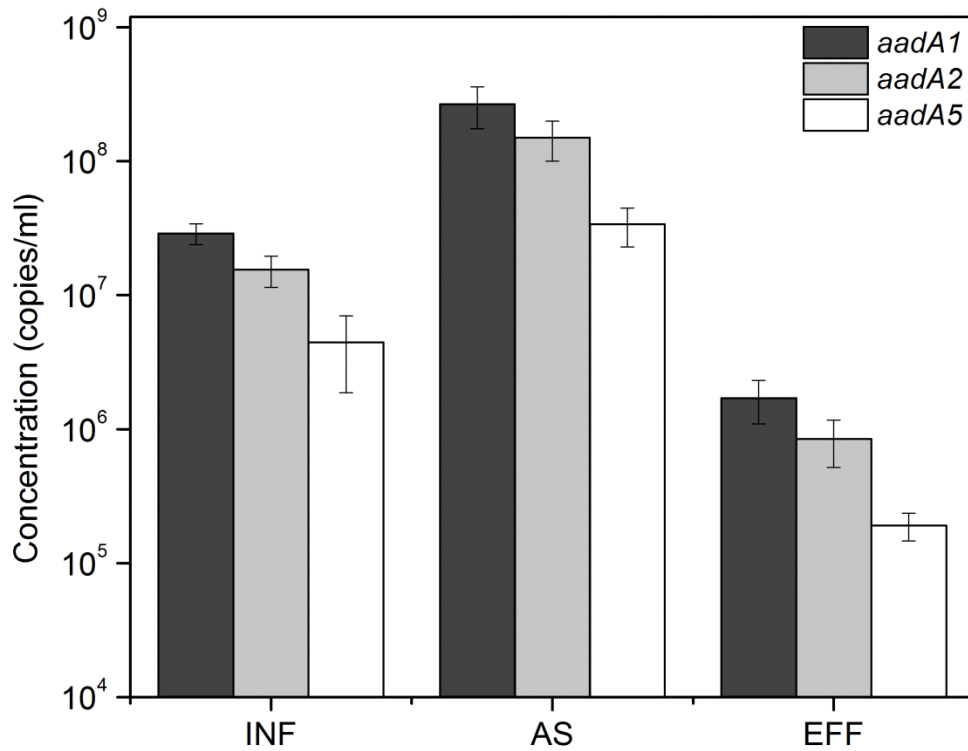

56

57 **Figure S1** Abundance (copies/ml) of the dominant genes encoded by class 1 integron  
 58 gene cassettes. The gene cassettes *aadA* alleles (*aadA1*, *aadA2* and *aadA5*) confer  
 59 resistance to aminoglycosides. INF, influent; AS, activated sludge; EFF, effluent.

60 Mean ± SD.

61

62

63

64

65

66

67

68

69

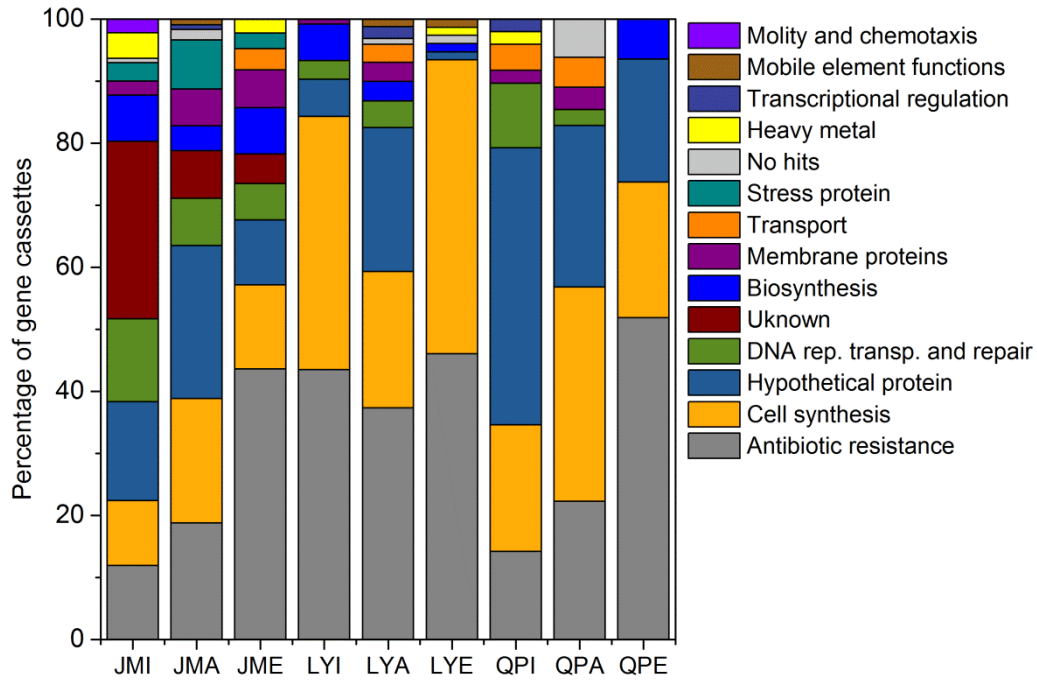

70

71 **Figure S2** Proportion of class 1 integron-associated gene cassettes in three  
 72 wastewater treatment plants, basing on high throughput sequencing data. DNA rep.  
 73 transp. and repair stands for DNA replication transport and repair. Each sample was  
 74 labelled with the abbreviation of WWTPs and sample types. For example, QPE refers  
 75 to the effluent sample (E) from of Qianpu (QP) wastewater treatment plant.

76

77

78

79

80

81

82

83

84

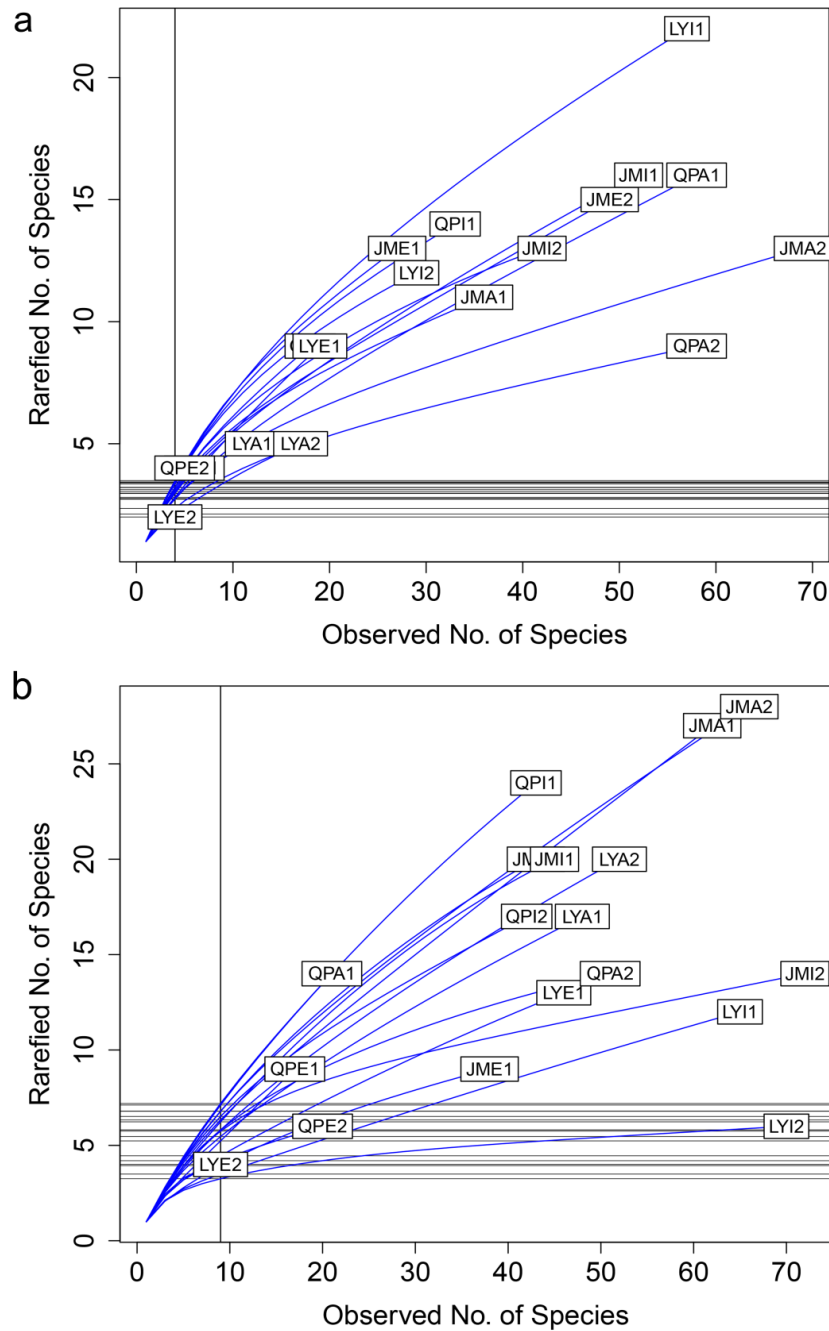

85

86 **Figure S3** Rarefaction curves of integron gene cassettes in wastewater treatment  
 87 plants, basing on the data of clone library. (a) Observed diversity of class 1 integron  
 88 gene cassettes in three wastewater treatment plants. (b) Observed diversity of class 3  
 89 integron gene cassettes in three wastewater treatment plants. Each sample was  
 90 labelled with the abbreviation of WWTPs and sample types. For example, QPE refers  
 91 to the effluent sample (E) from of Qianpu (QP) wastewater treatment plant.
